# Supplementary material for: Understanding the complexity of socioeconomic disparities in type 2 diabetes risk: a study of 4.3 million people in Sweden
Source: PubMed Central journal article supplement (PMC6861116; doi:10.1136/bmjdrc-2019-000749), 2019-11-07
Supplement: bmjdrc-2019-000749supp001.pdf [file bmjdrc-2019-000749supp001.pdf]

## Supplemental information, S1

Number, prevalence and prevalence ratio of type 2 diabetes among multicategorical strata. CI: Confidence Intervals.

| Gender | Age    | Immigration status | Educational achievement | Income | Number        | Prevalence by percentage (99% CI) | Prevalence Ratio (99% CI) |                  |
|--------|--------|--------------------|-------------------------|--------|---------------|-----------------------------------|---------------------------|------------------|
| Women  | 40–49  | Native             | High                    | High   | 69 689        | 0.6 (0.5–0.6)                     | Ref                       |                  |
|        |        |                    |                         | Middle | 69 254        | 0.7 (0.6–0.8)                     | 1.2 (1.0–1.5)             |                  |
|        |        |                    |                         | Low    | 72 036        | 0.8 (0.7–0.8)                     | 1.4 (1.2–1.6)             |                  |
|        |        |                    | Low                     |        | High          | 44 580                            | 1.0 (0.9–1.2)             | 1.9 (1.6–2.3)    |
|        |        |                    |                         |        | Middle        | 84 069                            | 1.2 (1.1–1.3)             | 2.2 (1.9–2.6)    |
|        |        |                    |                         |        | Low           | 163 010                           | 1.5 (1.5–1.6)             | 2.8 (2.4–3.2)    |
|        |        | Immigrant          | High                    |        | High          | 8 175                             | 1.3 (1.0–1.6)             | 2.3 (1.8–3.1)    |
|        |        |                    |                         |        | Middle        | 9 722                             | 1.3 (1.0–1.6)             | 2.4 (1.8–3.1)    |
|        |        |                    |                         |        | Low           | 19 426                            | 2.0 (1.8–2.3)             | 3.7 (3.1–4.4)    |
|        |        |                    | Low                     |        | High          | 4 389                             | 1.4 (1.0–1.9)             | 2.6 (1.8–3.7)    |
|        |        |                    |                         |        | Middle        | 11 077                            | 2.0 (1.6–2.3)             | 3.6 (2.9–4.5)    |
|        |        |                    |                         |        | Low           | 48 035                            | 3.5 (3.3–3.7)             | 6.3 (5.5–7.3)    |
|        | 50–59  | Native             | High                    | High   | 80 362        | 1.4 (1.3–1.5)                     | 2.6 (2.2–3.0)             |                  |
|        |        |                    |                         | Middle | 56 068        | 1.4 (1.3–1.5)                     | 2.6 (2.2–3.0)             |                  |
|        |        |                    |                         | Low    | 39 016        | 1.5 (1.3–1.6)                     | 2.7 (2.3–3.2)             |                  |
|        |        |                    | Low                     |        | High          | 89 147                            | 2.5 (2.4–2.6)             | 4.5 (3.9–5.2)    |
|        |        |                    |                         |        | Middle        | 101 737                           | 3.2 (3.0–3.3)             | 5.8 (5.0–6.6)    |
|        |        |                    |                         |        | Low           | 97 453                            | 3.8 (3.6–3.9)             | 6.8 (6.0–7.9)    |
|        |        | Immigrant          | High                    |        | High          | 9 320                             | 2.2 (1.8–2.5)             | 3.9 (3.1–4.9)    |
|        |        |                    |                         |        | Middle        | 8 279                             | 2.4 (1.9–2.8)             | 4.3 (3.4–5.4)    |
|        |        |                    |                         |        | Low           | 11 673                            | 4.1 (3.6–4.6)             | 7.5 (6.3–8.9)    |
|        |        |                    | Low                     |        | High          | 10 375                            | 3.5 (3.0–3.9)             | 6.3 (5.2–7.6)    |
|        |        |                    |                         |        | Middle        | 16 717                            | 4.7 (4.3–5.1)             | 8.6 (7.3–10.1)   |
|        |        |                    |                         |        | Low           | 33 990                            | 7.4 (7.1–7.8)             | 13.6 (11.8–15.6) |
|        | 60–69  | Native             | High                    | High   | 120 862       | 3.0 (2.8–3.1)                     | 5.4 (4.7–6.2)             |                  |
|        |        |                    |                         | Middle | 32 242        | 4.6 (4.3–4.9)                     | 8.3 (7.2–9.7)             |                  |
|        |        |                    |                         | Low    | 12 461        | 4.6 (4.1–5.1)                     | 8.4 (7.1–9.9)             |                  |
|        |        |                    | Low                     |        | High          | 146 071                           | 4.5 (4.4–4.6)             | 8.2 (7.1–9.4)    |
|        |        |                    |                         |        | Middle        | 120 775                           | 7.1 (6.9–7.3)             | 12.9 (11.3–14.8) |
|        |        |                    |                         |        | Low           | 63 247                            | 9.0 (8.7–9.3)             | 16.4 (14.3–18.8) |
|        |        | Immigrant          | High                    |        | High          | 10 396                            | 4.4 (3.9–4.9)             | 8.1 (6.7–9.6)    |
|        |        |                    |                         |        | Middle        | 4 995                             | 6.4 (5.5–7.3)             | 11.7 (9.6–14.2)  |
|        |        |                    |                         |        | Low           | 4 801                             | 8.3 (7.3–9.4)             | 15.2 (12.6–18.3) |
|        |        |                    | Low                     |        | High          | 13 451                            | 5.7 (5.2–6.2)             | 10.4 (8.9–12.3)  |
|        |        |                    |                         |        | Middle        | 16 032                            | 8.7 (8.1–9.2)             | 15.8 (13.6–18.3) |
|        |        |                    |                         |        | Low           | 18 315                            | 13.3 (12.6–13.9)          | 24.2 (21.0–27.9) |
| 70–79  | Native | High               | High                    | 40 353 | 4.7 (4.4–4.9) | 8.5 (7.4–9.8)                     |                           |                  |
|        |        |                    | Middle                  | 24 277 | 6.6 (6.2–7.0) | 12.0 (10.4–13.9)                  |                           |                  |
|        |        |                    | Low                     | 8 893  | 7.3 (6.6–8.0) | 13.3 (11.3–15.7)                  |                           |                  |
|        |        |                    | Low                     | 37 792 | 6.7 (6.3–7.0) | 12.2 (10.6–14.0)                  |                           |                  |

| Gender | Age     | Immigration status | Educational achievement | Income    | Number  | Prevalence by percentage (99% CI) | Prevalence Ratio (99% CI) |                  |                  |
|--------|---------|--------------------|-------------------------|-----------|---------|-----------------------------------|---------------------------|------------------|------------------|
| Women  | 80 – 84 |                    |                         | Middle    | 85 740  | 9.3 (9.0–9.6)                     | 17.0 (14.8–19.4)          |                  |                  |
|        |         |                    |                         | Low       | 111 084 | 11.5 (11.2–11.7)                  | 20.9 (18.3–23.9)          |                  |                  |
|        |         | Immigrant          | High                    | High      | 3 683   | 5.5 (4.6–6.5)                     | 10.1 (8.1–12.6)           |                  |                  |
|        |         |                    |                         | Middle    | 3 152   | 7.6 (6.3–8.8)                     | 13.8 (11.1–17.0)          |                  |                  |
|        |         |                    |                         | Low       | 2 995   | 10.9 (9.5–12.4)                   | 19.9 (16.4–24.2)          |                  |                  |
|        |         |                    | Low                     | High      | 3 438   | 7.4 (6.2–8.5)                     | 13.5 (10.9–16.6)          |                  |                  |
|        |         |                    |                         | Middle    | 10 889  | 11.3 (10.5–12.1)                  | 20.6 (17.7–23.9)          |                  |                  |
|        |         |                    |                         | Low       | 18 757  | 14.6 (13.9–15.2)                  | 26.6 (23.1–30.6)          |                  |                  |
|        |         |                    |                         | Native    | High    | High                              | 7 886                     | 6.3 (5.6–7.0)    | 11.5 (9.7–13.7)  |
|        |         |                    |                         |           | Middle  | 6 997                             | 6.9 (6.1–7.7)             | 12.6 (10.5–15.0) |                  |
|        |         |                    |                         |           | Low     | 3 344                             | 7.4 (6.2–8.5)             | 13.4 (10.9–16.6) |                  |
|        |         |                    |                         | Low       | High    | 8 792                             | 7.9 (7.1–8.6)             | 14.4 (12.2–16.9) |                  |
|        |         |                    |                         |           | Middle  | 27 425                            | 10.0 (9.5–10.4)           | 18.2 (15.8–20.9) |                  |
|        |         |                    |                         |           | Low     | 68 403                            | 11.4 (11.1–11.7)          | 20.7 (18.1–23.7) |                  |
|        |         |                    | Immigrant               | High      | High    | 782                               | 6.0 (3.8–8.2)             | 11.0 (7.4–16.3)  |                  |
|        |         |                    |                         |           | Middle  | 883                               | 7.8 (5.5–10.1)            | 14.3 (10.2–20.0) |                  |
|        |         |                    |                         |           | Low     | 1 031                             | 9.6 (7.2–12.0)            | 17.5 (13.1–23.4) |                  |
|        |         |                    |                         | Low       | High    | 721                               | 8.5 (5.8–11.1)            | 15.4 (10.8–22.0) |                  |
|        |         |                    |                         | Middle    | 2 936   | 10.8 (9.3–12.2)                   | 19.6 (16.1–23.9)          |                  |                  |
|        |         |                    |                         | Low       | 8 258   | 12.4 (11.5–13.3)                  | 22.6 (19.4–26.4)          |                  |                  |
| Men    | 40 – 49 |                    |                         | High      | 87 561  | 0.6 (0.6–0.7)                     | 1.2 (1.0–1.4)             |                  |                  |
|        |         |                    |                         | Middle    | 52 388  | 0.8 (0.7–0.9)                     | 1.4 (1.1–1.6)             |                  |                  |
|        |         |                    |                         | Low       | 32 939  | 0.9 (0.8–1.0)                     | 1.6 (1.3–2.0)             |                  |                  |
|        |         |                    | Low                     | High      | 100 775 | 1.7 (1.6–1.8)                     | 3.1 (2.7–3.6)             |                  |                  |
|        |         |                    |                         | Middle    | 115 130 | 1.8 (1.7–1.9)                     | 3.2 (2.8–3.7)             |                  |                  |
|        |         |                    |                         | Low       | 135 850 | 1.9 (1.8–2.0)                     | 3.5 (3.1–4.1)             |                  |                  |
|        |         |                    | Immigrant               | High      | High    | 8 095                             | 1.6 (1.3–2.0)             | 3.0 (2.3–3.9)    |                  |
|        |         |                    |                         |           | Middle  | 8 094                             | 2.2 (1.8–2.7)             | 4.1 (3.2–5.1)    |                  |
|        |         |                    |                         |           | Low     | 15 323                            | 3.3 (2.9–3.6)             | 5.9 (5.0–7.1)    |                  |
|        |         |                    | Low                     | High      | 7 457   | 2.5 (2.0–2.9)                     | 4.5 (3.6–5.7)             |                  |                  |
|        |         |                    |                         | Middle    | 13 746  | 2.6 (2.2–2.9)                     | 4.7 (3.9–5.7)             |                  |                  |
|        |         |                    |                         | Low       | 41 548  | 4.3 (4.0–4.5)                     | 7.8 (6.7–9.0)             |                  |                  |
|        |         | 50 – 59            |                         |           | High    | 75 944                            | 2.8 (2.7–3.0)             | 5.2 (4.5–6.0)    |                  |
|        |         |                    |                         |           | Middle  | 41 746                            | 2.8 (2.6–3.0)             | 5.0 (4.3–5.9)    |                  |
|        |         |                    |                         |           | Low     | 25 374                            | 2.9 (2.7–3.2)             | 5.3 (4.5–6.3)    |                  |
|        |         |                    |                         | Low       | High    | 111 734                           | 4.9 (4.8–5.1)             | 9.0 (7.8–10.3)   |                  |
|        |         |                    |                         |           | Middle  | 110 392                           | 5.0 (4.9–5.2)             | 9.2 (8.0–10.5)   |                  |
|        |         |                    |                         |           | Low     | 108 341                           | 5.1 (4.9–5.2)             | 9.2 (8.0–10.6)   |                  |
|        |         |                    |                         | Immigrant | High    | High                              | 6 781                     | 5.0 (4.3–5.6)    | 9.0 (7.5–11.0)   |
|        |         |                    |                         |           |         | Middle                            | 6 365                     | 6.2 (5.4–6.9)    | 11.2 (9.3–13.5)  |
|        |         |                    |                         |           |         | Low                               | 12 481                    | 8.6 (7.9–9.2)    | 15.7 (13.4–18.3) |
|        |         |                    |                         | Low       | High    | 9 270                             | 6.0 (5.4–6.6)             | 11.0 (9.2–13.0)  |                  |
|        |         |                    |                         |           | Middle  | 13 683                            | 7.5 (6.9–8.1)             | 13.7 (11.7–16.0) |                  |
|        |         |                    |                         |           | Low     | 33 876                            | 9.7 (9.3–10.2)            | 17.8 (15.5–20.4) |                  |

| Gender | Age   | Immigration status | Educational achievement | Income | Number  | Prevalence by percentage (99% CI) | Prevalence Ratio (99% CI) |
|--------|-------|--------------------|-------------------------|--------|---------|-----------------------------------|---------------------------|
| Men    | 60–69 | Native             | High                    | High   | 125 187 | 6.9 (6.7–7.0)                     | 12.5 (10.9–14.3)          |
|        |       |                    | Middle                  |        | 32 254  | 8.4 (8.0–8.8)                     | 15.3 (13.3–17.6)          |
|        |       |                    | Low                     |        | 14 114  | 7.9 (7.3–8.5)                     | 14.5 (12.4–16.8)          |
|        |       |                    | Low                     | High   | 153 698 | 9.1 (8.9–9.3)                     | 16.5 (14.5–18.9)          |
|        |       |                    | Middle                  |        | 102 738 | 10.8 (10.5–11.0)                  | 19.6 (17.2–22.5)          |
|        |       |                    | Low                     |        | 60 890  | 11.1 (10.8–11.4)                  | 20.3 (17.7–23.2)          |
|        |       | Immigrant          | High                    | High   | 8 919   | 9.3 (8.5–10.1)                    | 17.0 (14.5–20.0)          |
|        |       |                    | Middle                  |        | 5 039   | 11.7 (10.5–12.8)                  | 21.3 (18.0–25.2)          |
|        |       |                    | Low                     |        | 6 936   | 13.7 (12.6–14.7)                  | 24.9 (21.3–29.1)          |
|        |       |                    | Low                     | High   | 12 187  | 10.6 (9.9–11.3)                   | 19.3 (16.6–22.4)          |
|        |       |                    | Middle                  |        | 12 445  | 14.8 (14.0–15.6)                  | 27.0 (23.4–31.2)          |
|        |       |                    | Low                     |        | 16 960  | 16.4 (15.7–17.1)                  | 29.9 (26.0–34.5)          |
|        | 70–79 | Native             | High                    | High   | 54 881  | 9.6 (9.2–9.9)                     | 17.4 (15.2–20.0)          |
|        |       |                    | Middle                  |        | 27 851  | 11.3 (10.8–11.8)                  | 20.6 (18.0–23.7)          |
|        |       |                    | Low                     |        | 10 571  | 12.4 (11.6–13.2)                  | 22.6 (19.5–26.3)          |
|        |       |                    | Low                     | High   | 37 590  | 12.3 (11.9–12.8)                  | 22.5 (19.6–25.8)          |
|        |       |                    | Middle                  |        | 72 411  | 14.1 (13.7–14.4)                  | 25.6 (22.4–29.3)          |
|        |       |                    | Low                     |        | 66 079  | 14.6 (14.3–15.0)                  | 26.6 (23.3–30.5)          |
|        |       | Immigrant          | High                    | High   | 5 080   | 11.6 (10.4–12.8)                  | 21.2 (17.9–25.1)          |
|        |       |                    | Middle                  |        | 3 847   | 13.9 (12.4–15.3)                  | 25.3 (21.3–30.0)          |
|        |       |                    | Low                     |        | 3 872   | 16.1 (14.6–17.7)                  | 29.4 (24.9–34.8)          |
|        |       |                    | Low                     | High   | 2 940   | 13.2 (11.6–14.8)                  | 24.0 (19.9–28.9)          |
|        |       |                    | Middle                  |        | 7 949   | 15.1 (14.1–16.1)                  | 27.6 (23.7–32.1)          |
|        |       |                    | Low                     |        | 10 570  | 17.6 (16.6–18.6)                  | 32.1 (27.8–37.1)          |
|        | 80–84 | Native             | High                    | High   | 10 121  | 10.1 (9.3–10.8)                   | 18.4 (15.7–21.4)          |
|        |       |                    | Middle                  |        | 9 291   | 11.4 (10.6–12.3)                  | 20.9 (17.9–24.3)          |
|        |       |                    | Low                     |        | 5 567   | 12.0 (10.8–13.1)                  | 21.8 (18.5–25.7)          |
|        |       |                    | Low                     | High   | 5 917   | 12.9 (11.8–14.0)                  | 23.6 (20.0–27.7)          |
|        |       |                    | Middle                  |        | 17 805  | 13.9 (13.2–14.5)                  | 25.3 (21.9–29.1)          |
|        |       |                    | Low                     |        | 37 986  | 14.0 (13.5–14.4)                  | 25.5 (22.2–29.2)          |
|        |       | Immigrant          | High                    | High   | 969     | 11.0 (8.5–13.6)                   | 20.1 (15.2–26.7)          |
|        |       |                    | Middle                  |        | 918     | 10.8 (8.2–13.4)                   | 19.7 (14.7–26.3)          |
|        |       |                    | Low                     |        | 1 012   | 12.5 (9.8–15.1)                   | 22.7 (17.4–29.6)          |
|        |       |                    | Low                     | High   | 286     | 11.5 (6.7–16.4)                   | 21.0 (13.2–33.6)          |
|        |       |                    | Middle                  |        | 1 329   | 13.9 (11.5–16.4)                  | 25.4 (20.2–32.0)          |
|        |       |                    | Low                     |        | 3 170   | 16.8 (15.1–18.5)                  | 30.7 (25.8–36.5)          |
